# Supplementary material for: A biomimetic tarso-conjunctival biphasic scaffold for eyelid reconstruction in vivo
Source: Royal Society of Chemistry journal article supplement (doi:10.1039/c9bm00431a), 2019-01-01
Supplement: c9bm00431a1.pdf [file c9bm00431a1.pdf]

## Supplemental Materials for

### A biomimetic tarso-conjunctival biphasic scaffold for eyelid reconstruction in vivo

Peifang Xu,<sup>#a</sup> Qi Gao,<sup>#a</sup> Xue Feng,<sup>b</sup> Lixia Lou,<sup>a</sup> Tiepei Zhu,<sup>a</sup> Changyou Gao<sup>\*b</sup> and Juan Ye<sup>\*a</sup>

<sup>a</sup> Department of Ophthalmology, the Second Affiliated Hospital of Zhejiang University,

College of Medicine, Hangzhou, Zhejiang, 310009, China.

<sup>b</sup> MOE Key Laboratory of Macromolecular Synthesis and Functionalization,

Department of Polymer Science and Engineering, Zhejiang University, Hangzhou, 310027, China.

\* To whom correspondence should be addressed. Tel: +86-13858193908.

E -mail: [yejuan@zju.edu.cn](mailto:yejuan@zju.edu.cn) ; [cygao@zju.edu.cn](mailto:cygao@zju.edu.cn)

# These authors contribute equally to this work.

Figure S1

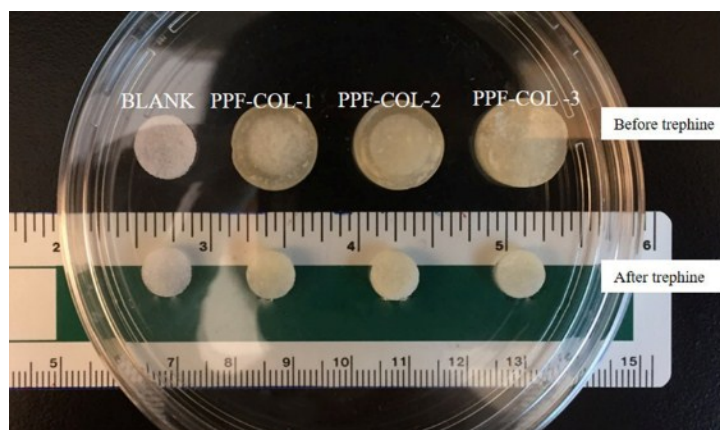

**Fig. S1.** A digital image of the PPF-COL bilayer scaffolds. Scaffolds before (top) and after trephine (bottom).

Figure S2

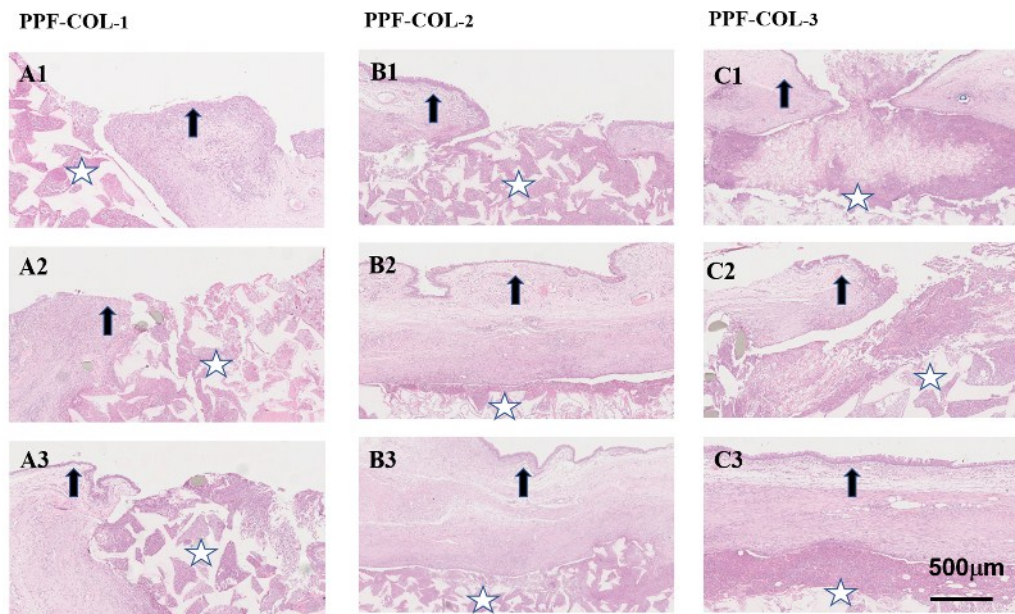

**Fig. S2.** HE staining of sections of parallel samples after being treated with (A1-3) PPF-COL-1, (B1-3) PPF-COL-2, and (C1-3) PPF-COL-3 scaffolds. Black arrows point out conjunctiva tissue and white pentagrams point out the scaffolds. Scale bar: 500  $\mu\text{m}$

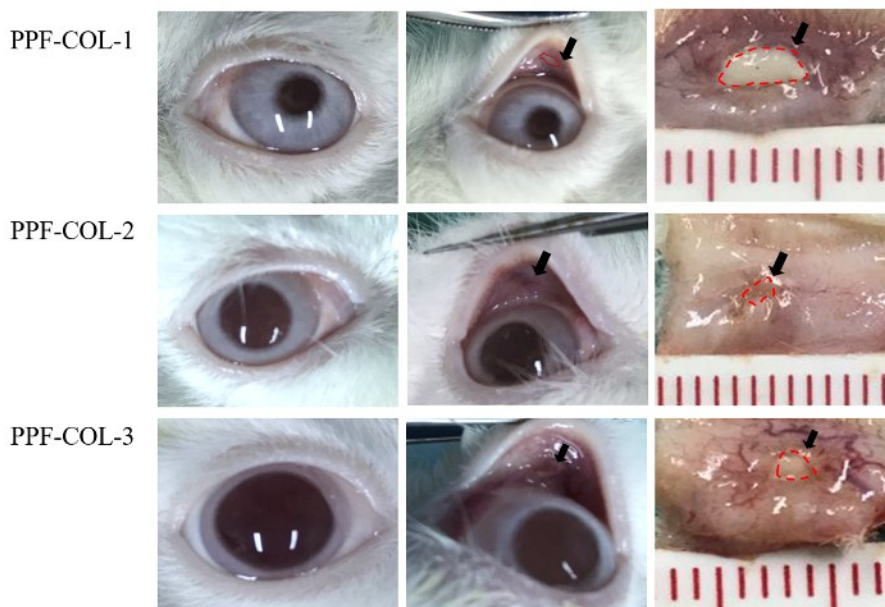

**Fig. S3.** Post-surgery appearance of the 2th week and macroscopic photographs of the healed defects. Black arrows point out the defect site.
